# Supplementary material for: Environmental Risk Assessment of Heavy Metals by Exploring Chemical Fractions, Leachability, Bioavailability in Road Dusts from Steel-Industrial City (Anshan), Northeastern China
Source: Research Square preprint supplement (doi:10.21203/rs.3.rs-431433/v1), 2021-05-27
Supplement: Supplementary file 1 [file ee24495828ce00694800caf1.docx]

Table S1 Sequential chemical extraction method of heavy metals in RDs

| Step | Chemical fraction | Reagent | Conditions |
| --- | --- | --- | --- |
| F1 | Water-soluble  /exchangeable | 16 ml 1 M Mg2Cl2 solution (pH 7.0) | Agitation (40rmp) for 1h at room temperature |
| F2 | Carbonate bound | 8 ml 1mol/L NaOAC (pH 5.0 with HOAc) | Agitation (40rmp) for 5h at room temperature |
| F3 | Fe-Mn oxide bound | 40ml 0.04M NH2OH·HCl in 25% (v/v) HOAC | Heating at 96±2℃ and intermittently shaking for 6h |
| F4 | Organically bound | 20ml 7M NaOCl (pH8.5 with HCl) (two times) | Heating at 96±2℃ and intermittently shaking for 2h (two times) |
| F5 | Residual | Aqua regia | Heating |
